# Supplementary material for: Comparative analysis of the root transcriptomes of cultivated and wild rice varieties in response to Magnaporthe oryzae infection revealed both common and species-specific pathogen responses
Source: PubMed Central journal article supplement (PMC5910329; doi:10.1186/s12284-018-0211-8), 2018-04-20
Supplement: 12284_2018_211_MOESM2_ESM.pdf [file 12284_2018_211_MOESM2_ESM.pdf]

**Additional file 2: Table S1** Summary of Illumina RNA-sequencing reads mapped to the reference genes. The four treatments were non-inoculated cultivated rice (C), cultivated rice inoculated with *Magnaporthe oryzae* (C+F), non-inoculated wild rice (W), and wild rice inoculated with *M. oryzae* (W+F).

| Treatment   | Total reads in each sample(M) | Total base pairs in each sample(G) | Total clean reads in each sample(M) | Total mapped reads in each sample(M) | Percentage of reads mapped in each sample | Average percentage of reads mapped in each treatment | Average read length |
|-------------|-------------------------------|------------------------------------|-------------------------------------|--------------------------------------|-------------------------------------------|------------------------------------------------------|---------------------|
| <b>C1</b>   | 64.645                        | 9.6970                             | 57.375                              | 50.830                               | 88.590                                    |                                                      | 145.8               |
| <b>C2</b>   | 64.752                        | 9.7130                             | 57.928                              | 52.421                               | 98.000                                    | 91.77                                                | 145.9               |
| <b>C3</b>   | 63.555                        | 9.5330                             | 55.533                              | 49.276                               | 88.730                                    |                                                      | 145.4               |
| <b>C+F1</b> | 64.078                        | 9.6120                             | 57.121                              | 49.273                               | 86.260                                    |                                                      | 145.7               |
| <b>C+F2</b> | 33.887                        | 5.0830                             | 29.646                              | 26.489                               | 89.350                                    | 88.28                                                | 145.4               |
| <b>C+F3</b> | 40.453                        | 6.0680                             | 36.169                              | 32.277                               | 89.240                                    |                                                      | 145.5               |
| <b>W1</b>   | 38.137                        | 5.7210                             | 33.901                              | 28.271                               | 83.390                                    |                                                      | 145.7               |
| <b>W2</b>   | 30.544                        | 4.5820                             | 27.635                              | 22.224                               | 80.420                                    | 80.70                                                | 146                 |
| <b>W3</b>   | 46.214                        | 6.9320                             | 41.264                              | 32.304                               | 78.290                                    |                                                      | 145                 |
| <b>W+F1</b> | 52.278                        | 7.8420                             | 46.386                              | 36.753                               | 79.230                                    |                                                      | 145.4               |
| <b>W+F2</b> | 62.420                        | 9.3630                             | 54.258                              | 43.610                               | 80.380                                    | 78.12                                                | 144.4               |
| <b>W+F3</b> | 63.176                        | 9.4760                             | 54.745                              | 40.929                               | 74.760                                    |                                                      | 144.8               |
