# Supplementary material for: Comparative analysis of the root transcriptomes of cultivated and wild rice varieties in response to Magnaporthe oryzae infection revealed both common and species-specific pathogen responses
Source: PubMed Central journal article supplement (PMC5910329; doi:10.1186/s12284-018-0211-8), 2018-04-20
Supplement: 12284_2018_211_MOESM4_ESM.pdf [file 12284_2018_211_MOESM4_ESM.pdf]

**Additional file 4: Table S2.** RNA-sequencing and quantitative reverse transcription PCR (qRT-PCR) data of the verified genes. The fold-changes shown were obtained from RNA-sequencing and qRT-PCR data derived from C+F vs C comparison and W+F vs W comparison. Red, blue and black colors indicate the up- (fold-changes  $\geq 2$  with a q-value  $< 0.05$ ), down-regulated (fold-changes  $\leq 2$  with a q-value  $< 0.05$ ) and unchanged genes, respectively. The four treatments were non-inoculated cultivated rice (C), cultivated rice inoculated with *Magnaporthe oryzae* (C+F), non-inoculated wild rice (W), and wild rice inoculated with *M. oryzae* (W+F).

| Gene ID             | RNA-sequencing data |         |             |         | qRT-PCR data |         |             |         |
|---------------------|---------------------|---------|-------------|---------|--------------|---------|-------------|---------|
|                     | C+F vs C            |         | W+F vs W    |         | C+F vs C     |         | W+F vs W    |         |
|                     | Fold-change         | q-value | Fold-change | q-value | Fold-change  | q-value | Fold-change | q-value |
| <i>Os06g0726200</i> | -1.69               | 0.06    | 4.93        | <0.01   | -2.32        | 0.09    | 9.73        | <0.01   |
| <i>Os12g0168700</i> | 1.46                | 0.06    | 2.29        | 0.04    | -2.14        | 0.21    | 5.85        | <0.01   |
| <i>Os03g0290300</i> | -1.08               | 0.77    | 2.41        | <0.01   | -1.88        | 0.07    | 4.38        | <0.01   |
| <i>Os08g0448000</i> | 1.02                | 0.96    | 2.54        | <0.01   | -2.64        | 0.24    | 11.79       | <0.01   |
| <i>Os04g0229100</i> | -1.74               | <0.01   | 2.01        | <0.01   | -2.75        | <0.01   | 4.92        | <0.01   |
| <i>Os02g0627100</i> | 1.39                | 0.04    | 2.51        | <0.01   | 1.52         | 0.08    | 6.50        | <0.01   |
| <i>Os04g0483500</i> | 3.13                | <0.01   | -1.23       | 0.47    | 3.50         | <0.01   | 1.41        | 0.08    |
