# Supplementary material for: Comparative analysis of the root transcriptomes of cultivated and wild rice varieties in response to Magnaporthe oryzae infection revealed both common and species-specific pathogen responses
Source: PubMed Central journal article supplement (PMC5910329; doi:10.1186/s12284-018-0211-8), 2018-04-20
Supplement: 12284_2018_211_MOESM6_ESM.pdf [file 12284_2018_211_MOESM6_ESM.pdf]

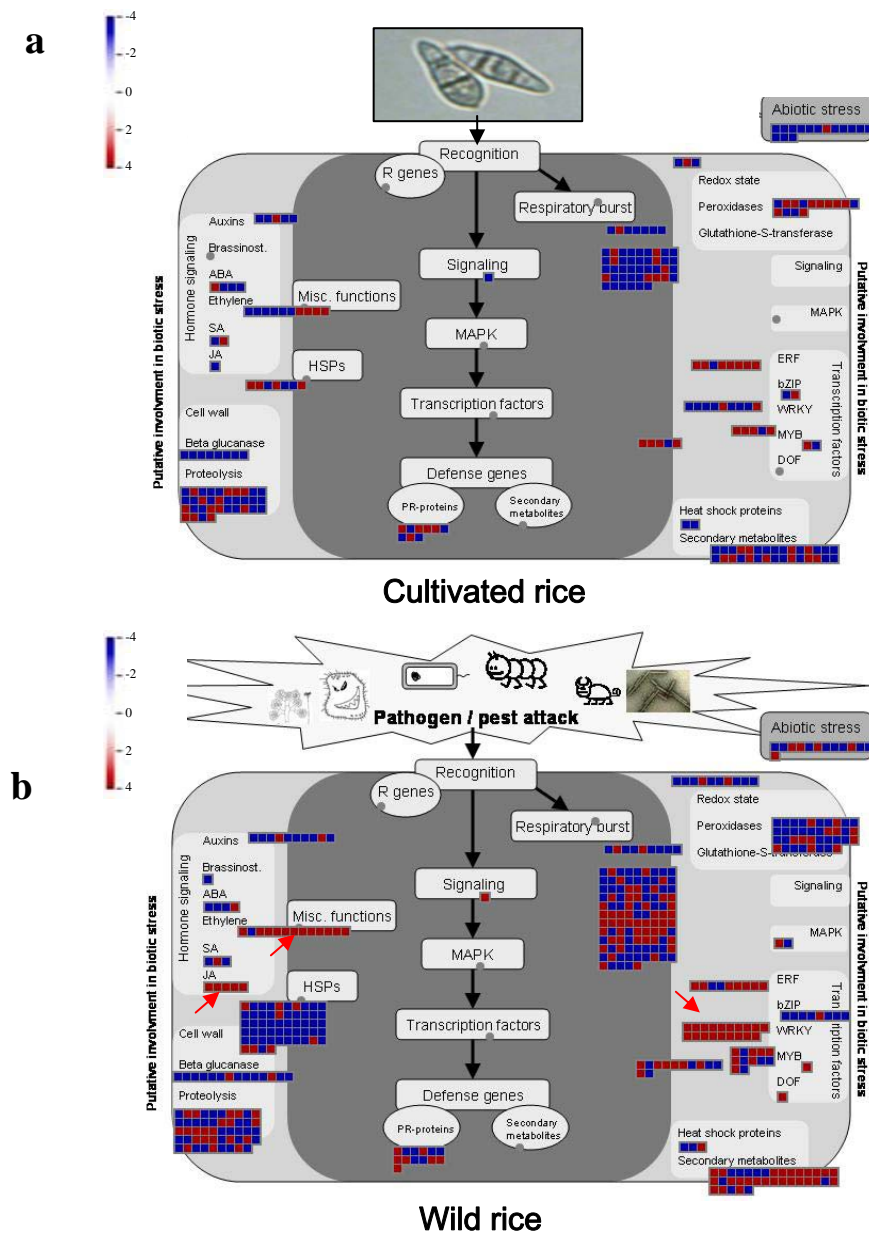

**Additional file 6: Figure S4** MapMan analysis of the genes and pathways responsive to the pathogenic invasion using the differentially expressed genes derived from (a) comparison C+F vs C, and (b) comparison W+F vs W. Red arrows indicate the pathways enriched in up-regulated genes. Blue and red colors indicate down- and up-regulated genes, respectively. The colored bar in each panel shows fold changes in gene expression. The four treatments were non-inoculated cultivated rice (C), cultivated rice inoculated with *Magnaporthe oryzae* (C+F), non-inoculated wild rice (W), and wild rice inoculated with *M. oryzae* (W+F).
